# Supplementary material for: Pasteurized retail dairy enables genomic surveillance of H5N1 avian influenza virus in United States cattle
Source: bioRxiv or medRxiv preprint supplement (doi:10.1101/2024.12.12.24318872), 2024-12-13
Supplement: Supplementary file [file media-1.pdf]

# Supplemental Material:

**S1 Fig: Nextclade clustering of HA segment against the H5Nx 2.3.4.4 clade tree.**

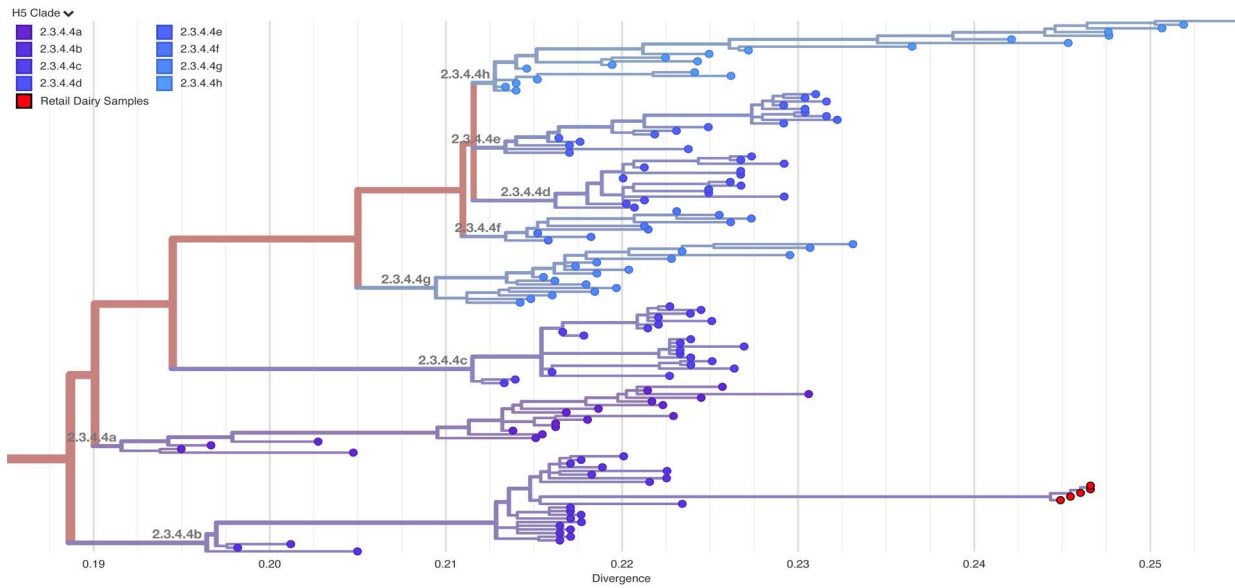

## Supplemental data 1:

To test primer specificity *in silico*, several H5 HA sequences from birds [OR858836.1 (goose, NY 2023), OR819057.1 (peregrine falcon, NY 2022), OQ968076.1 (goose, WY 2022), OQ968052.1 (goose, MN 2022), OQ968012.1 (chicken, WI 2022)] were downloaded and the two sets of selected primers and probes were aligned to ensure they would bind to other 2.3.4.4b sequences from the current outbreak in North American birds. This was done to confirm the primers would continue working in the event of a new introduction from birds to cows. Sequences from A/Victoria/4897/2022 H1N1 and A/Darwin/9/2021 H3N2, two isolates that have been recommended as vaccine components in recent years, were also downloaded to ensure the selected primers and probes would not align to commonly-circulating sequences (47). The primer sequences did not align to sequences from influenza B viruses B/Austria/13594/7/2021 (B/Victoria lineage) and B/Phuket/3073/2013 (B/Yamagata lineage). To test this specificity *in vitro*, the two primer/probe sets were tested on H5N1 clade 2.3.4.4b vRNA, A/California/04/2009(H1N1) vRNA, and Influenza A/Kawasaki/173/2001 M gene RNA transcript. Only one set proved specific to the H5 sequence, with the primer sequence 5'-GGGAAGCTATGCGACCTAAAT-3' (forward) and 5'-CATTCCGGCACTCTGATGAA-3' (reverse) and the probe sequence 5'-ACATTGGGTTTC-CGAGGAGCCATC-3' with a FAM fluorophore. This set was used for all further analysis.

**S1 Table: Sequences from Andersen Lab github used for generating tiled-amplicon scheme.**

| Sequence                                              |
|-------------------------------------------------------|
| Consensus SRR28752446 HA cns threshold 0.5 quality 20 |
| Consensus SRR28752447 HA cns threshold 0.5 quality 20 |











|                                                       |
|-------------------------------------------------------|
| Consensus SRR28752673 HA cns threshold 0.5 quality 20 |
| Consensus SRR28752674 HA cns threshold 0.5 quality 20 |
| Consensus SRR28752675 HA cns threshold 0.5 quality 20 |
| Consensus SRR28752676 HA cns threshold 0.5 quality 20 |
| Consensus SRR28752677 HA cns threshold 0.5 quality 20 |
| Consensus SRR28752678 HA cns threshold 0.5 quality 20 |
| Consensus SRR28752679 HA cns threshold 0.5 quality 20 |
| Consensus SRR28752680 HA cns threshold 0.5 quality 20 |
| Consensus SRR28752681 HA cns threshold 0.5 quality 20 |
| Consensus SRR28752682 HA cns threshold 0.5 quality 20 |
| Consensus SRR28752683 HA cns threshold 0.5 quality 20 |
| Consensus SRR28752684 HA cns threshold 0.5 quality 20 |

**S2 Table: Primer pools used in tiled-amplicon sequencing.**

| Name                | Pool name | Sequence                       |
|---------------------|-----------|--------------------------------|
| HPAI-HA-250 1 LEFT  | 1         | TGGAGAACATAGTACTACTTCTTGCAA    |
| HPAI-HA-250 1 RIGHT | 1         | GATGAATTCGTCGCACATTGGG         |
| HPAI-HA-250 2 LEFT  | 2         | ATGGGGTGAAGCCACTGATTTT         |
| HPAI-HA-250 2 RIGHT | 2         | CCCTAGTGATGTTTCATGATTTGGC      |
| HPAI-HA-250 3 LEFT  | 1         | CACATGTTGAGCAGAATAAATCATTTTGAG |
| HPAI-HA-250 3 RIGHT | 1         | GTCTGCTCTTCTGCATTGTTGG         |
| HPAI-HA-250 4 LEFT  | 2         | GATGCATACCCAACAATAAAGATAAGCT   |
| HPAI-HA-250 4 RIGHT | 2         | TGGATTGCATCATCTGGTTTTAAGATTG   |
| HPAI-HA-250 5 LEFT  | 1         | GCTACTAGATCCCAAGTAAACGGG       |
| HPAI-HA-250 5 RIGHT | 1         | GAGAGGATGTATGTTGTGAAATGGC      |
| HPAI-HA-250 6 LEFT  | 2         | AAAGTGGAGTGGAAATATGGCCA        |
| HPAI-HA-250 6 RIGHT | 2         | ACCAACCATCAACCATTCCCTG         |
| HPAI-HA-250 7 LEFT  | 1         | GAAAAAGAGGTCTGTTTGGGGC         |
| HPAI-HA-250 7 RIGHT | 1         | TGTTCAAATTCTCTATCCTCCTTTCTAAGT |
| HPAI-HA-250 8 LEFT  | 2         | ACTCAATCATTGACAAAATGAACACTCA   |
| HPAI-HA-250 8 RIGHT | 2         | TTCGAAACAGCCGTTACCCAG          |
| HPAI-HA-250 9 LEFT  | 1         | GTCAAGAACCTTTACGACAAAGTCAG     |
| HPAI-HA-250 9 RIGHT | 1         | GGGAACCTTGCCGCTGTTGAAT         |
| HPAI-MP-250 1 LEFT  | 1         | CTAACCGAGGTCGAAACGTACG         |
| HPAI-MP-250 1 RIGHT | 1         | CCACTTAGGGCACTTTGGACAA         |
| HPAI-MP-250 2 LEFT  | 2         | TTGGGATTTGTGTTACGCTCA          |
| HPAI-MP-250 2 RIGHT | 2         | CAATGCCACTTCTGCGGTCA           |
| HPAI-MP-250 3 LEFT  | 1         | CGGTGCACTTGCCAGTTGTAT          |
| HPAI-MP-250 3 RIGHT | 1         | TCCATGGCTTCCACTGCTTG           |
| HPAI-MP-250 4 LEFT  | 2         | TGTTTTGGCCAGTACTACAGC          |
| HPAI-MP-250 4 RIGHT | 2         | AGATCCCAATGATACTTGCGGC         |
| HPAI-MP-250 5 LEFT  | 1         | CCTTGAAAATTTGCAGGCCTACC        |
| HPAI-MP-250 5 RIGHT | 1         | TCAACATCCACAGCACTCTGC          |
| HPAI-NA-250 1 LEFT  | 1         | GAATCCAAATCAGAAGATAACAACCATTG  |
| HPAI-NA-250 1 RIGHT | 1         | GCCCGCTAATGTTACCGAAGTA         |
| HPAI-NA-250 2 LEFT  | 2         | GGTAAATCAGACGTATATCAACATCAGC   |

|                     |   |                               |
|---------------------|---|-------------------------------|
| HPAI-NA-250 2 RIGHT | 2 | GAGTGTTTGTCATTCAGCAGAGC       |
| HPAI-NA-250 3 LEFT  | 1 | TTGTTATAAGAGAACCATTCATCTCATGC |
| HPAI-NA-250 3 RIGHT | 1 | TCTGGACCAGAAATACCGATTGTC      |
| HPAI-NA-250 4 LEFT  | 2 | TTTGAGTCTGTTGCTTGGTCGG        |
| HPAI-NA-250 4 RIGHT | 2 | TGAAGATTTTATATGAGGCCTGCCC     |
| HPAI-NA-250 5 LEFT  | 1 | CTCAAGAATCTGAATGTGCTTGCG      |
| HPAI-NA-250 5 RIGHT | 1 | ACTCCAGATTTTGATTAAAGATACCCAC  |
| HPAI-NA-250 6 LEFT  | 2 | CGGGTGATATTATGTGTGTGTGC       |
| HPAI-NA-250 6 RIGHT | 2 | CGCTTCTGGAAGTAGTGCTTTTTG      |
| HPAI-NA-250 7 LEFT  | 1 | GGCATATGGGGTAAAAGGGTTTTTC     |
| HPAI-NA-250 7 RIGHT | 1 | TAGCTCAACCCAGAAACAAGGC        |
| HPAI-NA-250 8 LEFT  | 2 | GGACAGTAGTTTCTCAGTGAAGCA      |
| HPAI-NA-250 8 RIGHT | 2 | CAATGGTGAATGGCAACTCAGC        |
| HPAI-NP-250 1 LEFT  | 1 | CTCAAGGCACCAAACGATCCTA        |
| HPAI-NP-250 1 RIGHT | 1 | AGCACTGGGATGTTCTCCA           |
| HPAI-NP-250 2 LEFT  | 2 | CCAAAACAGCATAACCATAGAAAGGA    |
| HPAI-NP-250 2 RIGHT | 2 | GGAATGCCAAATCATCAAGTGAGTG     |
| HPAI-NP-250 3 LEFT  | 1 | GAGATCAGAAGAATTTGGCGTCAAG     |
| HPAI-NP-250 3 RIGHT | 1 | TCCTCGTTTGATCATTCTGAATCAATTC  |
| HPAI-NP-250 4 LEFT  | 2 | TCACTGATGCAAGGCTCAACC         |
| HPAI-NP-250 4 RIGHT | 2 | CATTCCCAGGATTCCGGCTTT         |
| HPAI-NP-250 5 LEFT  | 1 | TCAAGGGAAAGCTCCAAACAGC        |
| HPAI-NP-250 5 RIGHT | 1 | TGGAGCAGACGGAAAGGATCA         |
| HPAI-NP-250 6 LEFT  | 2 | ACTTGCTGTAGCCAGTGGATATG       |
| HPAI-NP-250 6 RIGHT | 2 | GCAATCTGAACTCCTCTGGTGG        |
| HPAI-NP-250 7 LEFT  | 1 | GAGAGTGTCAAGCTTCATCAGAGG      |
| HPAI-NP-250 7 RIGHT | 1 | TGATGGTTGCTCTCTCGAATGG        |
| HPAI-NP-250 8 LEFT  | 2 | TCTGCAGGACAAATCAGCGTAC        |
| HPAI-NP-250 8 RIGHT | 2 | CATTGTTTATGTCAAAGGAAGGCA      |
| HPAI-NS-250 1 LEFT  | 1 | CCAACACTGTGTTAAGCTTTCAGG      |
| HPAI-NS-250 1 RIGHT | 1 | GGCACAGAGGCAATAGTCATTTT       |
| HPAI-NS-250 2 LEFT  | 2 | TGCTGGGAAGCAGATAGTGA          |
| HPAI-NS-250 2 RIGHT | 2 | TCCAGCCGATTGAAGATCACAC        |
| HPAI-NS-250 3 LEFT  | 1 | TCCCTCAGTATCAGAATGGACCA       |
| HPAI-NS-250 3 RIGHT | 1 | AAAGTTTCAGAGACTCGAACTGTGT     |
| HPAI-NS-250 4 LEFT  | 2 | TGCCTTCTCTCCAGGACATACT        |
| HPAI-NS-250 4 RIGHT | 2 | TCTGTGATCTTTAGTCTGTGTGCGC     |
| HPAI-PA-250 1 LEFT  | 1 | GGAAGACTTTGTGCGACAATGC        |
| HPAI-PA-250 1 RIGHT | 1 | GCTCGGTCTCTCCCTTCGATTA        |
| HPAI-PA-250 2 LEFT  | 2 | GTCTGTTTCATGTATTCGGATTCCA     |
| HPAI-PA-250 2 RIGHT | 2 | TGAACTTCCCTTCGCGTACTC         |
| HPAI-PA-250 3 LEFT  | 1 | CCTCCCTGATTTGTATGACTACAGAG    |
| HPAI-PA-250 3 RIGHT | 1 | AGGAATCCCATAGACCTCTACTGG      |
| HPAI-PA-250 4 LEFT  | 2 | TGATGAAGAGAGCAGAGCAAGAA       |
| HPAI-PA-250 4 RIGHT | 2 | AGAAAGCTTGCCCTCAATGCA         |



|                       |   |                               |
|-----------------------|---|-------------------------------|
| HPAI-PA-250 5 LEFT    | 1 | ACCGAACTTCTCCAGCCTTGA         |
| HPAI-PA-250 5 RIGHT   | 1 | TATGCCCTCCCCCTCATGACTA        |
| HPAI-PA-250 6 LEFT    | 2 | ATTACCTGATGGGCCTCCCT          |
| HPAI-PA-250 6 RIGHT   | 2 | GGAATTTTCTCCTCATTTCATGTCTTG   |
| HPAI-PA-250 7 LEFT    | 1 | TGAGAAAGGCATAAACCTAATTACCT    |
| HPAI-PA-250 7 RIGHT   | 1 | TTCACTCTGAATCCAGCTTGCT        |
| HPAI-PA-250 8 LEFT    | 2 | AGATGTTAGCGATCTAAGACAGTACG    |
| HPAI-PA-250 8 RIGHT   | 2 | GGGCTGTGTTTATGTATACTCCCTT     |
| HPAI-PA-250 9 LEFT    | 1 | GGAACTATTTACAGCGGAGGT         |
| HPAI-PA-250 9 RIGHT   | 1 | GTTAGAGAGAATTCCATGCTCACAAAG   |
| HPAI-PA-250 10 LEFT   | 2 | GGAGGACAAATCTGTATGGATTCATT    |
| HPAI-PA-250 10 RIGHT  | 2 | CTCATCTCCATGCCCCATTTC         |
| HPAI-PA-250 11 LEFT   | 1 | TGCTCCTACGGACTGCAATAGG        |
| HPAI-PA-250 11 RIGHT  | 1 | TTCCAATAGAGCCTTCCTCCA         |
| HPAI-PA-250 12 LEFT   | 2 | GGCCGAATCTTCTGTCAAAGAGA       |
| HPAI-PA-250 12 RIGHT  | 2 | CCAAGATCGAAGGTTCCAGGTT        |
| HPAI-PB1-250 1 LEFT   | 1 | CCTTACTCTTCTTGAAAGTTCAGC      |
| HPAI-PB1-250 1 RIGHT  | 1 | CGCAGTCCGTTTGTGCATAC          |
| HPAI-PB1-250 2 LEFT   | 2 | GGCACCTCAACTCAATCCAATTG       |
| HPAI-PB1-250 2 RIGHT  | 2 | CCTCTATAGTATTAGCTAATGCAGTTGC  |
| HPAI-PB1-250 3 LEFT   | 1 | GAGTGGACAAGTTGACCCAAGG        |
| HPAI-PB1-250 3 RIGHT  | 1 | CCGTTGTGTGACCATTTTCTTG        |
| HPAI-PB1-250 4 LEFT   | 2 | GTGGTGAATCAATGGATAAAGAGGA     |
| HPAI-PB1-250 4 RIGHT  | 2 | AGTACACAAACCCTCTGATTTGCA      |
| HPAI-PB1-250 5 LEFT   | 1 | TGACAAAAGACGCCGAAAGAGG        |
| HPAI-PB1-250 5 RIGHT  | 1 | CTGGTTCTCATTCCATTTAGTGTGTC    |
| HPAI-PB1-250 6 LEFT   | 2 | GTGAGAAAGATGATGACTAATTCGCAA   |
| HPAI-PB1-250 6 RIGHT  | 2 | CTGCCGGTATTTGTGTTCGAAG        |
| HPAI-PB1-250 7a LEFT  | 1 | CAGGAATGTATTGAGCATTGCACC      |
| HPAI-PB1-250 7a RIGHT | 1 | CCCAGAACTGTACTCAGCATGTT       |
| HPAI-PB1-250 7b LEFT  | 1 | GGAATGTATTGAGCATTGCACC        |
| HPAI-PB1-250 7b RIGHT | 1 | CCCAGAACTGTACTCAGCATG         |
| HPAI-PB1-250 8 LEFT   | 2 | CCTCTTCTAATAGATGGTACGGCC      |
| HPAI-PB1-250 8 RIGHT  | 2 | GCTCATATTGATTCCTACCAGCTTG     |
| HPAI-PB1-250 9 LEFT   | 1 | GTGAATGCTCCAAATCATGAGGG       |
| HPAI-PB1-250 9 RIGHT  | 1 | TTGTTGATCATGTTGTTCTTTATCACTGT |
| HPAI-PB1-250 10 LEFT  | 2 | GAGTTGCCAGCTTTGGAGTT          |
| HPAI-PB1-250 10 RIGHT | 2 | TCCTGGTTTTGAGCGGGTTG          |
| HPAI-PB1-250 11 LEFT  | 1 | GGAGACACACAAATTCAAACAAGGAG    |
| HPAI-PB1-250 11 RIGHT | 1 | GCATCACCACAGCATTGTTTAC        |
| HPAI-PB1-250 12 LEFT  | 2 | GGGAAGGCTTTGTAATCCCCTG        |
| HPAI-PB1-250 12 RIGHT | 2 | CTCCTGTATGAACTGCTAGGGAAG      |
| HPAI-PB1-250 13 LEFT  | 1 | CGCTCTATTCTTAATACAAGCCAAAGG   |
| HPAI-PB1-250 13 RIGHT | 1 | ATTTCTGCCGTCTGAGCTCTTC        |
| HPAI-PB2-250 1 LEFT   | 1 | TGGAGAGAATAAAAGAACTGAGAGATCT  |

|                          |   |                                       |
|--------------------------|---|---------------------------------------|
| HPAI-PB2-250 1 RIGHT     | 1 | GATCCGGCATCATTGTCTTGC                 |
| HPAI-PB2-250 2 LEFT      | 2 | TATCCAATCGCAGCAGACAAGC                |
| HPAI-PB2-250 2 RIGHT     | 2 | TGGTTTCTGAAGTGTACAGGGC                |
| HPAI-PB2-250 3 LEFT      | 1 | ACAATTCACTATCCAAAGGTATACAAAACC        |
| HPAI-PB2-250 3 RIGHT     | 1 | CCTGGAGTTCTTCTTTCTTTTCCTTTG           |
| HPAI-PB2-250 4 LEFT      | 2 | TTCCAAATGAAGTGGGAGCGAG                |
| HPAI-PB2-250 4 RIGHT     | 2 | CGTTTCTCACTTCTCCTCCTGG                |
| HPAI-PB2-250 5 LEFT      | 1 | GTGTCTACATTGAGGTGCTGCA                |
| HPAI-PB2-250 5 RIGHT     | 1 | CATATGTCCACGGCTTGTTCCT                |
| HPAI-PB2-250 6 LEFT      | 2 | CCACAGCACACAAATTGGAGGA                |
| HPAI-PB2-250 6 RIGHT     | 2 | CGTTGCTCTTCTTCCAACCATAGT              |
| HPAI-PB2-250 7 LEFT      | 1 | GTCAAAGGGAAGAAGAGGTGCT                |
| HPAI-PB2-250 7 RIGHT     | 1 | GTTGACAAAGTTCAGATCACCTCG              |
| HPAI-PB2-250 8 LEFT      | 2 | GAAGCAATAATCGTGGCCATGG                |
| HPAI-PB2-250 8 RIGHT     | 2 | TGACTCTTATTCCCCTCAGTGACA              |
| HPAI-PB2-250 9 LEFT      | 1 | TGACAATGTGATGGGAATGATCGG              |
| HPAI-PB2-250 9 RIGHT     | 1 | TGATCTCCCACATCATTGATGACG              |
| HPAI-PB2-250 10 LEFT     | 2 | TCACCCGAAGAAGTCAGCGA                  |
| HPAI-PB2-250 10 RIGHT    | 2 | TGTCCTCACGAACCCACTGTAT                |
| HPAI-PB2-250 11 LEFT     | 1 | AAGATGGAGTTCGAGCCATTCC                |
| HPAI-PB2-250 11 RIGHT    | 1 | TTGAACACTGGAGAATTGCCTCTT              |
| HPAI-PB2-250 12 LEFT     | 2 | TGCAATTCTCCTCTCTGACTGTG               |
| HPAI-PB2-250 12 RIGHT    | 2 | TGCTCAGCTCATTGATGCTCAG                |
| HPAI-PB2-250 13 LEFT     | 1 | CGAAGATCCAGATGAAGGCACA                |
| HPAI-PB2-250 13 RIGHT    | 1 | TGGCCATCCGAATTCTTTTGGT                |
| H5 HPAI-PB2-250-0-LEFT   | 2 | ATATACGCGTAGCRAAAGCAGGTCAA            |
| H5 HPAI-PB2-250-0-RIGHT  | 2 | CTTGCTCCAGAGGGTTTGTCC                 |
| H5 HPAI-PB2-250-14-LEFT  | 2 | TGAAGGCACAGCTGGAGTGG                  |
| H5 HPAI-PB2-250-14-RIGHT | 2 | GCGTAGTAGAAACAAGGTCG                  |
| H5 HPAI-PB1-250-0-LEFT   | 2 | ATATACGCGTAGCRAAAGCAGGCAAA            |
| H5 HPAI-PB1-250-0-RIGHT  | 2 | CCACTTGGCTCATTGTCATCAGG               |
| H5 HPAI-PB1-250-14-LEFT  | 2 | ACGAACAGATGTATCAAAGTGCTGC             |
| H5 HPAI-PB1-250-14-RIGHT | 2 | ATATACGCGTAGTAGAAACAAGGCAT            |
| H5 HPAI-PA-250-0-LEFT    | 2 | ACGCGTAGCAAAGCAGGTACTIONGAT           |
| H5 HPAI-PA-250-0-RIGHT   | 2 | ACTATTCACCACTGTCCAGGCC                |
| H5 HPAI-PA-250-13-LEFT   | 1 | ATATGCATCTCCTCAACTCGAGGG              |
| H5 HPAI-PA-250-13-RIGHT  | 1 | ACGCGTAGTAGAAACAAGGTACTIONTTTTTGGACAG |
| H5 HPAI-HA-250-0-LEFT    | 2 | ATATACGCGTAGCRAAAGCAGGGGTTCACTCTG     |
| H5 HPAI-HA-250-0-RIGHT   | 2 | TTCCGAGGAGCCATCCAGC                   |
| H5 HPAI-HA-250-10-LEFT   | 2 | GGAAAGTGTGARAAATGGGACG                |
| H5 HPAI-HA-250-10-RIGHT  | 2 | ATATACGCGTAGTAGAAACAAGGGTG            |
| H5 HPAI-NP-250-0-LEFT    | 2 | ATATACGCGTAGCAAAGCAGGGTAGATAATCAC     |
| H5 HPAI-NP-250-0-RIGHT   | 2 | CTCATCAAATGCCGAGAGAACC                |
| H5 HPAI-NP-250-9-LEFT    | 1 | CAACAGAGAGCATCTGCAGGAC                |
| H5 HPAI-NP-250-9-RIGHT   | 1 | ATATACGCGTAGTAGAAACAAGGGTATT          |

|                        |   |                                 |
|------------------------|---|---------------------------------|
| H5 HPAI-NA-250-0-LEFT  | 2 | ATATACGCGTAGCRAAAGCAGGAGTTC     |
| H5 HPAI-NA-250-0-RIGHT | 2 | GCCTGCTCAGCAAGAAAATTGG          |
| H5 HPAI-NA-250-9-LEFT  | 1 | ACTGGTCAGGATATAGTGGGAG          |
| H5 HPAI-NA-250-9-RIGHT | 1 | ATATACGCGTAGTAGAAACAAGGAGT      |
| H5 HPAI-MP-250-0-LEFT  | 2 | ATATACGCGTAGCRAAAGCAGGTAGATATTG |
| H5 HPAI-MP-250-0-RIGHT | 2 | AGCGTCTACGCTGCAGTCC             |
| H5 HPAI-MP-250-6-LEFT  | 2 | AAACGGATGGGAGTGCAAC             |
| H5 HPAI-MP-250-6-RIGHT | 2 | ATATACGCGTAGTAGAAACAAGGTAG      |
| H5 HPAI-NS-250-0-LEFT  | 2 | ATATACGCGTAGCRAAAGCAGGGTGACA    |
| H5 HPAI-NS-250-0-RIGHT | 2 | TCGTCGGATTCTTCTCCAGAATC         |
| H5 HPAI-NS-250-5-LEFT  | 1 | TACAGAGATTCGCTTGGAGAAGC         |
| H5 HPAI-NS-250-5-RIGHT | 1 | ATATACGCGTAGTAGAAACAAGGGTGTT    |

**S3 Table: Full results from RT-qPCR testing.**

| carton             | date purchased | date expiration | average cycle threshold | primer set  | processing plant state |
|--------------------|----------------|-----------------|-------------------------|-------------|------------------------|
| dholab carton 0001 | 4/24/24        | 5/8/24          |                         | M gene      | IA                     |
| dholab carton 0002 | 4/24/24        | 5/1/24          |                         | M gene      | IA                     |
| dholab carton 0003 | 4/24/24        | 6/5/24          |                         | M gene      | MN                     |
| dholab carton 0004 | 4/24/24        | 5/30/24         |                         | M gene      | MN                     |
| dholab carton 0005 | 4/24/24        | 6/20/24         | 32.435                  | M gene      | CO                     |
| dholab carton 0006 | 4/24/24        | 5/19/24         | 33.055                  | M gene      | CO                     |
| dholab carton 0007 | 4/24/24        | 5/8/24          |                         | M gene      | WI                     |
| dholab carton 0008 | 4/24/24        | 5/8/24          |                         | M gene      | WI                     |
| dholab carton 0009 | 4/24/24        | 5/2/24          |                         | M gene      | WI                     |
| dholab carton 0010 | 4/24/24        | 5/1/24          |                         | M gene      | IA                     |
| dholab carton 0011 | 4/24/24        | 5/1/24          |                         | M gene      | IA                     |
| dholab carton 0012 | 4/24/24        | 5/2/24          |                         | M gene      | WI                     |
| dholab carton 0013 | 4/24/24        | 5/7/24          |                         | M gene      | WI                     |
| dholab carton 0014 | 4/24/24        |                 |                         | M gene      | IA                     |
| dholab carton 0015 | 4/26/24        |                 |                         | M gene      | WI                     |
| dholab carton 0016 | 5/2/24         | 5/17/24         |                         | M gene      | VA                     |
| dholab carton 0017 | 5/2/24         | 6/6/24          |                         | M gene      | NY                     |
| dholab carton 0018 | 5/2/24         | 6/4/24          |                         | M gene      | OH                     |
| dholab carton 0019 | 5/2/24         | 6/17/24         | 33.52                   | M gene      | KY                     |
| dholab carton 0020 | 5/2/24         | 6/27/24         |                         | M gene      | CO                     |
| dholab carton 0021 | 5/2/24         | 6/4/24          | 31.17                   | M gene      | TX                     |
| dholab carton 0022 | 5/2/24         | 5/16/24         |                         | M gene      | UT                     |
| dholab carton 0023 | 5/2/24         | 5/30/24         |                         | M gene      | IN                     |
| dholab carton 0024 | 5/2/24         | 7/11/24         | 26.29                   | M gene      | MI                     |
| dholab carton 0005 | 4/24/24        | 6/20/24         | 31.34                   | M gene      | CO                     |
| dholab carton 0020 | 5/2/24         | 6/27/24         |                         | H5-specific | CO                     |
| dholab carton 0005 | 4/24/24        | 6/20/24         | 32.205                  | H5-specific | CO                     |
| dholab carton 0024 | 5/2/24         | 7/11/24         | 27.365                  | H5-specific | MI                     |

|                    |         |          |        |             |    |
|--------------------|---------|----------|--------|-------------|----|
| dholab carton 0025 | 5/20/24 | 7/29/24  |        | H5-specific | ID |
| dholab carton 0026 | 5/20/24 | 7/2/24   |        | H5-specific | KY |
| dholab carton 0027 | 5/20/24 | 7/27/24  | 38.435 | H5-specific | IN |
| dholab carton 0028 | 5/20/24 | 7/12/24  | 68.48  | H5-specific | KS |
| dholab carton 0029 | 5/20/24 | 6/21/24  |        | H5-specific | FL |
| dholab carton 0030 | 5/20/24 | 8/12/24  |        | H5-specific | MI |
| dholab carton 0031 | 5/20/24 | 11/18/24 |        | H5-specific | MO |
| dholab carton 0032 | 5/20/24 | 6/5/24   |        | H5-specific | WI |
| dholab carton 0033 | 5/20/24 | 9/12/24  | 38.785 | H5-specific | CO |
| dholab carton 0034 | 5/20/24 | 6/24/24  |        | H5-specific | NC |
| dholab carton 0035 | 5/20/24 | 7/4/24   |        | H5-specific | CA |
| dholab carton 0036 | 5/20/24 | 7/8/24   | 36.79  | H5-specific | CO |
| dholab carton 0037 | 5/20/24 | 6/30/24  |        | H5-specific | NY |
| dholab carton 0038 | 5/20/24 | 6/20/24  |        | H5-specific | OR |
| dholab carton 0039 | 5/20/24 | 6/11/24  |        | H5-specific | OH |
| dholab carton 0041 | 5/10/24 |          | 35.905 | H5-specific | MI |
| dholab carton 0042 | 5/10/24 |          |        | H5-specific | MI |
| dholab carton 0024 | 5/2/24  | 7/11/24  | 28.03  | H5-specific | MI |
| dholab carton 0043 | 6/5/24  | 6/23/24  |        | H5-specific | MN |
| dholab carton 0044 | 6/5/24  | 6/13/24  |        | H5-specific | WI |
| dholab carton 0045 | 6/5/24  | 6/11/24  |        | H5-specific | IN |
| dholab carton 0046 | 6/5/24  | 8/16/24  | 31.71  | H5-specific | CO |
| dholab carton 0047 | 6/5/24  | 6/6/24   |        | H5-specific | MI |
| dholab carton 0048 | 6/5/24  | 8/22/24  | 33.535 | H5-specific | MI |
| dholab carton 0049 | 6/5/24  | 6/13/24  |        | H5-specific | IA |
| dholab carton 0050 | 6/5/24  | 6/1/24   |        | H5-specific | IL |
| dholab carton 0051 | 6/5/24  | 6/10/24  |        | H5-specific | IL |
| dholab carton 0052 | 6/5/24  | 6/18/24  |        | H5-specific | WI |
| dholab carton 0053 | 6/5/24  | 6/28/24  |        | H5-specific | IN |
| dholab carton 0054 | 6/5/24  | 6/22/24  |        | H5-specific | TX |
| dholab carton 0055 | 6/5/24  | 6/20/24  |        | H5-specific | WI |
| dholab carton 0056 | 6/5/24  | 6/18/24  |        | H5-specific | WI |
| dholab carton 0057 | 6/17/24 | 7/31/24  |        | H5-specific | MN |
| dholab carton 0058 | 6/17/24 | 7/8/24   |        | H5-specific | IN |
| dholab carton 0059 | 6/17/24 | 6/25/24  |        | H5-specific | WI |
| dholab carton 0060 | 6/17/24 | 7/3/24   |        | H5-specific | WI |
| dholab carton 0061 | 6/17/24 | 6/18/24  |        | H5-specific | WI |
| dholab carton 0062 | 6/17/24 | 7/3/24   |        | H5-specific | WI |
| dholab carton 0063 | 6/17/24 | 8/29/24  | 33     | H5-specific | MI |
| dholab carton 0064 | 6/17/24 | 7/15/24  |        | H5-specific | IL |
| dholab carton 0065 | 6/17/24 | 8/23/24  | 29.89  | H5-specific | CO |
| dholab carton 0066 | 6/17/24 | 7/1/24   |        | H5-specific | IA |

|                    |         |         |  |             |    |
|--------------------|---------|---------|--|-------------|----|
| dholab carton 0067 | 6/17/24 | 7/22/24 |  | H5-specific | KY |
|--------------------|---------|---------|--|-------------|----|

**S4 Table: SRA Accession numbers for sequences produced in this study.**

| Sample Name | SRA Accession |
|-------------|---------------|
| Carton 05   | SRR31094760   |
| Carton 06   | SRR31094759   |
| Carton 21   | SRR31094758   |
| Carton 24   | SRR31094757   |
| Carton 33   | SRR31094756   |
| Carton 36   | SRR31094755   |
| Carton 46   | SRR31094754   |
| Carton 48   | SRR31094753   |
| Carton 63   | SRR31094752   |
| Carton 65   | SRR31094751   |

**S5 Table: Acknowledgement to sequence contributors in Nextclade.**

| Author                                                                                                                                                                                                                                                                                                                                                                    | sequences |
|---------------------------------------------------------------------------------------------------------------------------------------------------------------------------------------------------------------------------------------------------------------------------------------------------------------------------------------------------------------------------|-----------|
| Nguyen,T., Hutter,C., Markin,A., Thomas,M., Lantz,K., Killian,M.L., Janzen,G.M., Vijendran,S., Wagle,S., Inderski,B., Magstadt,D.R., Li,G., Diel,D.G., Frye,E.A., Dimitrov,K.M., Swinford,A.K., Thompson,A.C., Snevik,K.R., Suarez,D.L., Spackman,E., Lakin,S.M., C,S., Johnson,K.R., Baker,A.L., Robbe-Austerman,S., Torchetti,M.K., Anderson,T.K., Anderson,T.          | 228       |
| Aufderhar,M., Franzen,K., Killian,M.L., Lantz,K., Stuber,T., Hicks,J., Norris,C., Lakin,S.                                                                                                                                                                                                                                                                                | 261       |
| Kirby,M., Sheffield,S., Liddell,J., Frederick,J.C., Di,H., Lacey,K., Presley,S.M., Reinoso Webb,C., Malaeb,S., Cofi,M., Davis,T., Garten,R., Steel,J., Pusch,E., Barnes,J., Dugan,V., Garten,R.R.                                                                                                                                                                         | 1         |
| Aufderhar,M., Franzen,K., Killian,M., Lantz,K., Stuber,T., Hicks,J., Norris,C., Lakin,S.                                                                                                                                                                                                                                                                                  | 575       |
| ?                                                                                                                                                                                                                                                                                                                                                                         | 388       |
| Guan,L., Einfeld,A.J., Pattinson,D., Gu,C., Biswas,A., Maemura,T., Trifkovic,S., Babujee,L., Presler,R. Jr., Dahn,R., Halfmann,P.J., Barnhardt,T., Neumann,G., Thompson,A., Swinford,A.K., Dimitrov,K.M., Poulsen,K., Kawaoka,Y., Presler,R.                                                                                                                              | 9         |
| Hicks,J.A., Stuber,T., Norris,C., Lakin,S., Killian,M.L., Franzen,K., Aufderhar,M.                                                                                                                                                                                                                                                                                        | 31        |
| Norris,C., Tod,S., Jessica,H., Matthew,A., Kerrie,F., Mary,K., Steven,L., Kris,L.                                                                                                                                                                                                                                                                                         | 63        |
| Messer,K., Gnirke,A., McMahon,K., Gomez,M., Stetson,L., Stachler,E., Hill,T., Hill,S., Knoll,H., Curtis,E., Samani,P., Wewior,N., Vuyk,W., O'Connor,D., Brown,C., Madoff,L., Wohl,S., Ozonoff,A., Park,D., MacInnis,B., Sabeti,P.                                                                                                                                         | 19        |
| Halwe,N.J., Cool,K., Breithaupt,A., Schon,J., Trujillo,J.D., Nooruzzaman,M., Kwon,T., Ahrens,A.K., Britzke,T., McDowell,C.D., Piesche,R., Singh,G., Pinho dos Reis,V., Kafle,S., Pohlmann,A., Gaudreault,N., Corleis,B., Matias Ferreyra,F., Carossino,M., Balasuriya,U.B.R., Hensley,L., Morozov,I., Covalada,L.M., Diel,D., Ulrich,L., Hoffmann,D., Beer,M., Richt,J.A. | 1         |
| Halwe,N.J., Ulrich,L., Schoen,J., Piesche,R., Britzke,T., Ahrens,A.K., Pinho dos Reis,V., Grund,C., Pohlmann,A., Breithaupt,A., Hoffmann,D., Beer,M., Harder,T.                                                                                                                                                                                                           | 1         |
| Fabrizio,T.P., Kieffer,J.D., Franks,J., Jeevan,T., Kandeil,A., Walker,D., DeBeauchamp,J., Lowe,J.F., Bowman,A.S., Webby,R.J.                                                                                                                                                                                                                                              | 17        |
| Barnes,J., Steel,J., Garten,R., Davis,T., Dugan,V., Riner,D.A., Soehnen,M., Dover,M., Kirby,M.K., Sheffield,S., Liddell,J., Frederick,J.C., Di,H., Pusch,E., De La Cruz,J., Lacey,K.A.                                                                                                                                                                                    | 1         |
| Fabrizio,T.P., Kieffer,J.D., Franks,J., Jeevan,T., DeBeauchamp,J., Lowe,J.F., Bowman,A.S., Webby,R.J.                                                                                                                                                                                                                                                                     | 3         |
| Roychoudhury,P., Han,P., Kong,K., Xie,H., Gamboa,L., Rodriguez-Salas,L., Ellis,S.E., Greninger,A., Bedford,T., Starita,L., Chu,H.                                                                                                                                                                                                                                         | 1         |

|                                                                                                                                                                                                                                                                                                                                                             |   |
|-------------------------------------------------------------------------------------------------------------------------------------------------------------------------------------------------------------------------------------------------------------------------------------------------------------------------------------------------------------|---|
| Suarez,D.L., Goraichuk,I.V., Killmaster,L., Spackman,E., Clausen,N.J., Colonus,T.J., Leonard,C.L., Metz,M.L.                                                                                                                                                                                                                                                | 1 |
| Nguyen,T., C,C., Markin,A., Thomas,M., Lantz,K., Killian,M.L., Janzen,G.M., Vijendran,S., Wagle,S., Inderski,B., Magstadt,D.R., Li,G., Diel,D.G., Frye,E.A., Dimitrov,K.M., Swinford,A.K., Thompson,A.C., Snevik,K.R., Suarez,D.L., Spackman,E., Lakin,S.M., C,S., Johnson,K.R., Baker,A.L., Robbe-Austerman,S., Torchetti,M.K., Anderson,T.K., Anderson,T. | 1 |
| Burrough,E.R., Magstadt,D.R., Petersen,B., Timmermans,S.J., Gauger,P.C., Zhang,J., Siepker,C., Mainenti,M., Li,G., Thompson,A.C., Gorden,P.J., Plummer,P.J., Main,R., Hu,X.                                                                                                                                                                                 | 4 |
| Kirby,M.K., Steel,J., Garten,R., Davis,T., Dugan,V., Wilson,M., Liddell,J., Frederick,J.C., Di,H., Radford,K., De La Cruz,J., Keong,L., Lacek,K.A., Shu,B., Lopez,D., Seliskar,L., Le,H., Cadiz,V., Hua,C., Hok,S., Millena,S.                                                                                                                              | 1 |
| Kirby,M.K., Steel,J., Garten,R., Davis,T., Dugan,V., DaSilva,J., Liddell,J., Frederick,J.C., Di,H., Sheffield,S., Radford,K., De La Cruz,J., Keong,L., Lacek,K.A., Shu,B., Lopez,D., Seliskar,L., Le,H., Cadiz,V., Hua,C., Hok,S., Millena,S.                                                                                                               | 4 |
| Kirby,M.K., Steel,J., Garten,R., Davis,T., Dugan,V., Sheffield,S., Liddell,J., Frederick,J.C., Di,H., Radford,K., De La Cruz,J., Keong,L., Lacek,K.A., Shu,B., Lopez,D., Seliskar,L., Le,H., Cadiz,V., Hua,C., Hok,S., Millena,S.                                                                                                                           | 1 |
| Oguzie,J.U., Marushchak,L.V., Shittu,I., Lednicky,J.A., Miller,A.L., Hao,H., Nelson,M.I., Gray,G.C., Rodriguez,A.                                                                                                                                                                                                                                           | 1 |
| Shittu,I., Silva,D., Oguzie,J.U., Marushchak,L.V., Olinger,G., Lednicky,J.A., Trujillo-Vargas,C.M., Schneider,N.E., Hao,H., Gray,G.C.                                                                                                                                                                                                                       | 4 |
| Singh,G., Trujillo,J.D., Mcdowell,C., Fitz,I., Noll,L., Gaudreault,N., Retallick,J., Richt,J.                                                                                                                                                                                                                                                               | 1 |
| Barnes,J., Steel,J., Garten,R., Davis,T., Dugan,V., Matzinger,S.R., Kirby,M.K., Sheffield,S., Liddell,J., Frederick,J.C., Di,H., Pusch,E., De La Cruz,J., Keong,L., Lacek,K.A.                                                                                                                                                                              | 4 |
